# Supplementary material
Source: publisher figshare collection journal article supplement (https://acs.figshare.com/ndownloader/files/34639558)
Supplement: Supplementary file [file 34639558]

# Supporting Information:

## Native ambient mass spectrometry enables analysis of intact endogenous protein assemblies up to 145 kDa directly from tissue.

Oliver J. Hale, James W. Hughes, Emma K. Sisley and Helen J. Cooper\*

School of Biosciences, University of Birmingham, Edgbaston B15 2TT, U.K.

### TABLE OF CONTENTS

|                                                                                       |     |
|---------------------------------------------------------------------------------------|-----|
| Extended Experimental Details                                                         | S3  |
| Table S1: Haemotoxylin and eosin staining procedure                                   | S4  |
| Table S2: Theoretical and measured mass of identified protein assemblies and subunits | S5  |
| Figure S1: Intact mass of protein assemblies in brain                                 | S6  |
| Figure S2: MS/MS of MIF                                                               | S7  |
| Table S3: Sequence ions of MIF                                                        | S8  |
| Figure S3: MS/MS of PGAM1                                                             | S8  |
| Table S4: sequence ions of PGAM1                                                      | S9  |
| Figure S4: MS/MS of MDH2                                                              | S10 |
| Table S5: sequence ions for MDH2                                                      | S10 |
| Figure S5: ion images for MIF                                                         | S11 |
| Figure S6: ion images for PGAM1                                                       | S11 |
| Figure S7: ion images for MDH2                                                        | S12 |
| Figure S8: Intact mass of protein assemblies in kidney                                | S12 |
| Figure S9: MS/MS of $\alpha$ -enolase                                                 | S13 |
| Table S6: sequence ions for $\alpha$ -enolase                                         | S14 |
| Figure S10: MS/MS of MDH1                                                             | S15 |
| Table S7: sequence ions for MDH1                                                      | S16 |
| Figure S11: MS/MS of MDH2                                                             | S17 |
| Table S8: sequence ions of MDH2                                                       | S18 |
| Figure S12: MS/MS of omega-amidase                                                    | S20 |
| Table S9: sequence ions of omega-amidase                                              | S21 |
| Figure S13: ion images for MDH1                                                       | S22 |
| Figure S14: ion images for MDH2                                                       | S22 |
| Figure S15: ion images for omega-amidase                                              | S23 |
| Figure S16: native mass spectrum obtained from a blood vessel                         | S23 |
| Figure S17: ion images for serum albumin                                              | S24 |
| Figure S18: ion images for hemoglobin tetramer                                        | S24 |
| Figure S19: MS/MS of OTC                                                              | S25 |
| Table S10: sequence ions for OTC                                                      | S25 |

|                                               |     |
|-----------------------------------------------|-----|
| Figure S20: MS <sup>3</sup> of LDHA           | S26 |
| Table S11: sequence ions for LDHA             | S27 |
| Figure S21: nano-DESI analysis of intact LDHA | S27 |
| References                                    | S28 |

## EXPERIMENTAL DETAILS

### Nano-DESI

An XYZ-stage (Zaber Technologies Inc., Vancouver, Canada) was mounted at the mass spectrometer inlet. Solvent and sampling capillaries were flame-pulled from fused silica tubing (O.D. 275  $\mu\text{m}$ , I.D. 75  $\mu\text{m}$  prior to modification) and cut to a final outer diameter of approx. 100  $\mu\text{m}$ . The sampling capillary was positioned approx. 0.5 mm within the mass spectrometer inlet to aspirate solvent with the inlet vacuum. The exit of the sampling capillary was not flame-pulled but had the coating removed. Solvent was delivered through the solvent capillary by a 10 mL gas-tight syringe (Hamilton, Reno, NV) at a flow rate of 1.9-2.0  $\mu\text{L}/\text{min}$  and a liquid junction was formed between the two capillaries. High voltage was provided by a wire from the mass spectrometer power supply connected directly to the syringe needle and optimized for sensitivity and spray stability (typically between 0.8 and 1.5 kV). Electrospray optimization was performed on the protonated detergent ion signal (C8E4:  $m/z$  307.24) to achieve an RSD% of <10% and a spray current between 0.1 and 0.5  $\mu\text{A}$ . Each nano-DESI probe has slightly different characteristics and will optimize differently but this method provided consistent performance for native protein analysis with the solvent systems used.

Stage movement was controlled directly by Zaber Control (Zaber Technologies Inc.) or automated by custom software written in LabVIEW (NI, Austin, Texas). *In situ* intact protein profiling and top-down mass spectrometry analyses were performed by positioning thin tissue sections underneath the nano-DESI probe and scanning the probe across the surface at between 1 and 20  $\mu\text{m}/\text{s}$ . A relay connected to an Arduino Uno v3 microcontroller triggered contact closure to signal the start of a new line scan in MSI experiments.

### LESA microextraction and nanoelectrospray ionization

Proteins were extracted from tissue by LESA microextraction using a Triversa Nanomate robot (Advion Biosciences, Ithaca, NY) and extraction solvents comprising ammonium acetate (200 mM) containing detergent (specified with relevant data). A 96 well plate was cut in half and loaded into the well plate mount. The glass slide containing the thaw mounted tissue was secured in the remaining space of the well plate mount using adhesive putty. A method was defined in the advanced user interface (AUI) of the ChipSoft software whereby 5  $\mu\text{L}$  of the sampling solvent was aspirated from one of the wells of the well plate into a pipette tip. The pipette was positioned over the tissue and the pipette was brought in to contact with the tissue surface ("contact" LESA)<sup>1</sup>. 2  $\mu\text{L}$  solvent was dispensed and the tissue-liquid junction was maintained for 30 seconds including 10 dispense-respirate cycles before the solvent (2  $\mu\text{L}$ ) was re-aspirated into the pipette tip. The pipette was repositioned above a clean well

and the sample extract was deposited (5  $\mu$ L). 4  $\mu$ L of the solvent extract was transferred into a nanoESI emitter by use of a manual pipette fitted with a gel loading tip.

### Haemotoxylin and eosin staining procedure

Haemotoxylin and eosin staining was performed as described in Table S1. Thaw mounted tissue sections were sequentially submerged in solvent baths containing the described solvent and for the time period listed. Where a repeat submersion was required, a fresh bath of solvent was used. Tissue was mounted in DPX and a coverslip was applied before optical imaging.

Table S1: Haemotoxylin and eosin staining procedure.

| <b>Solvent Bath</b>          | <b>Time<br/>(min)</b> | <b>Repeat</b> |
|------------------------------|-----------------------|---------------|
| Water                        | 2                     | 1             |
| Haemotoxylin Harris          | 4                     | 0             |
| Water                        | 2                     | 1             |
| Acid Alcoholc                | 0.5                   | 0             |
| Water                        | 2                     | 1             |
| Scott's tap Water Substitute | 0.5                   | 0             |
| Water                        | 2                     | 1             |
| Eosin                        | 1                     | 0             |
| Water                        | 2                     | 1             |
| Industrial denatured alcohol | 2                     | 3             |
| Xylene                       | 2                     | 2             |

Table S2: Theoretical and measured average mass of identified protein assemblies and subunits.

|        | Protein                  | Uniprot entry | Assembly Stoichiometry          | PTMs                                  | Mass (assembly) (Da) | Theoretical mass (assembly) (Da) | Mass difference (ppm) | Measured mass (subunit) (Da) | Theoretical mass (subunit) (Da) | Mass difference (ppm) |
|--------|--------------------------|---------------|---------------------------------|---------------------------------------|----------------------|----------------------------------|-----------------------|------------------------------|---------------------------------|-----------------------|
| Brain  | MIF                      | P30904        | Homotrimer                      | N/A                                   | 37038.5              | 37038.5                          | 0.9                   | 12346.1                      | 12346.2                         | -9.0                  |
|        | PGAM1                    | P25113        | Homodimer                       | N-term acetylation, Y-phosphorylation | 57649.6              | 57646.1                          | 61.3                  | 28822.6                      | 28823.1                         | -14.3                 |
|        | MDH2                     | P04636        | Homodimer                       | N/A                                   | 66366.2              | 66365.4                          | 13.0                  | 33182.3                      | 33182.7                         | -12.3                 |
| Kidney | $\alpha$ -enolase (apo)  | P04764        | Monomer                         | N-term acetylation                    | N/A                  | N/A                              | N/A                   | 47039.2                      | 47038.7                         | 11.1                  |
|        | $\alpha$ -enolase (holo) | P04764        | Homodimer + 4x Mg <sup>2+</sup> | N-term acetylation                    | 94176.9              | 94175.7                          | 12.8                  | 47086.1                      | 47087.9                         | -36.8                 |
|        | MDH1                     | O88989        | Homodimer                       | N-term acetylation                    | 72789.6              | 72787.9                          | 23.2                  | 36393.7                      | 36394.0                         | -7.8                  |
|        | MDH2                     | P04636        | Homodimer                       | N/A                                   | 66366.0              | 66365.4                          | 10.0                  | 33183.4                      | 33182.7                         | 21.6                  |
|        | $\Omega$ -amidase        | O88989        | Homodimer                       | N-term acetylation                    | 61224.7              | 61224.2                          | 8.7                   | 30610.3                      | 30612.1                         | -57.4                 |
| Liver  | OTC                      | P00481        | Homotrimer                      | N/A                                   | 108831.7             | 108529.9                         | 2773.5                | 36177.0                      | 36176.6                         | 10.2                  |
|        | LDHA                     | P04642        | Homotetramer                    | N-term acetylation                    | 145449.0             | 145445.3                         | 25.6                  | 36360.2                      | 36361.3                         | -30.6                 |

## Rat brain

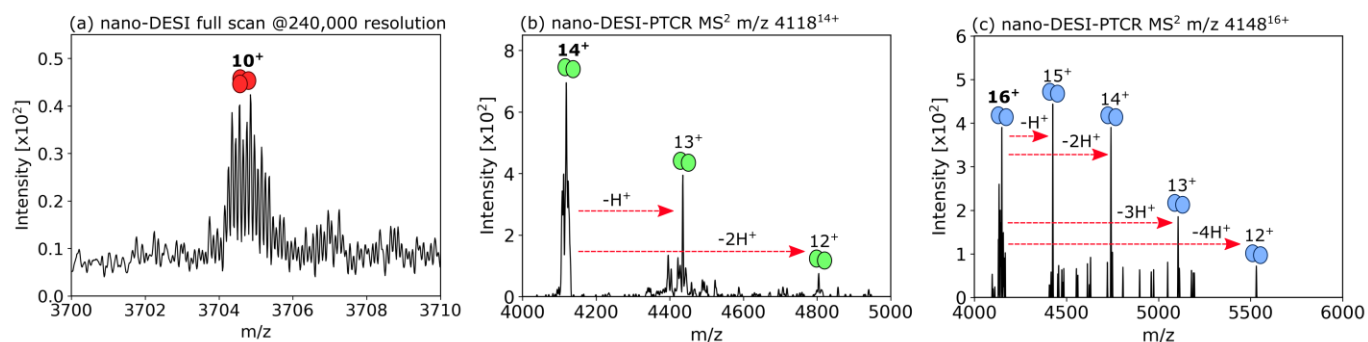

**Figure S1: Determination of the intact mass of protein assemblies in rat brain.** (a) nano-DESI full scan MS spectrum at a nominal resolution of 240,000 ( $m/z$  200) showing isotopically resolved signals for MIF in the 10+ charge state (approx. 37.0 kDa). (b) nano-DESI-PTCR MS<sup>2</sup> spectrum for  $m/z$  4118 indicating precursor ions in the 14+ charge state (approx. 57.6 kDa). (c) nano-DESI-PTCR MS<sup>2</sup> spectrum for  $m/z$  4148 indicating precursor ions in the 16+ charge state (approx. 66.3 kDa). PTCR spectra were acquired at orbitrap resolution = 7500 at  $m/z$  200 using a 200 mM ammonium acetate + 0.5x CMC C8E4 solvent system.

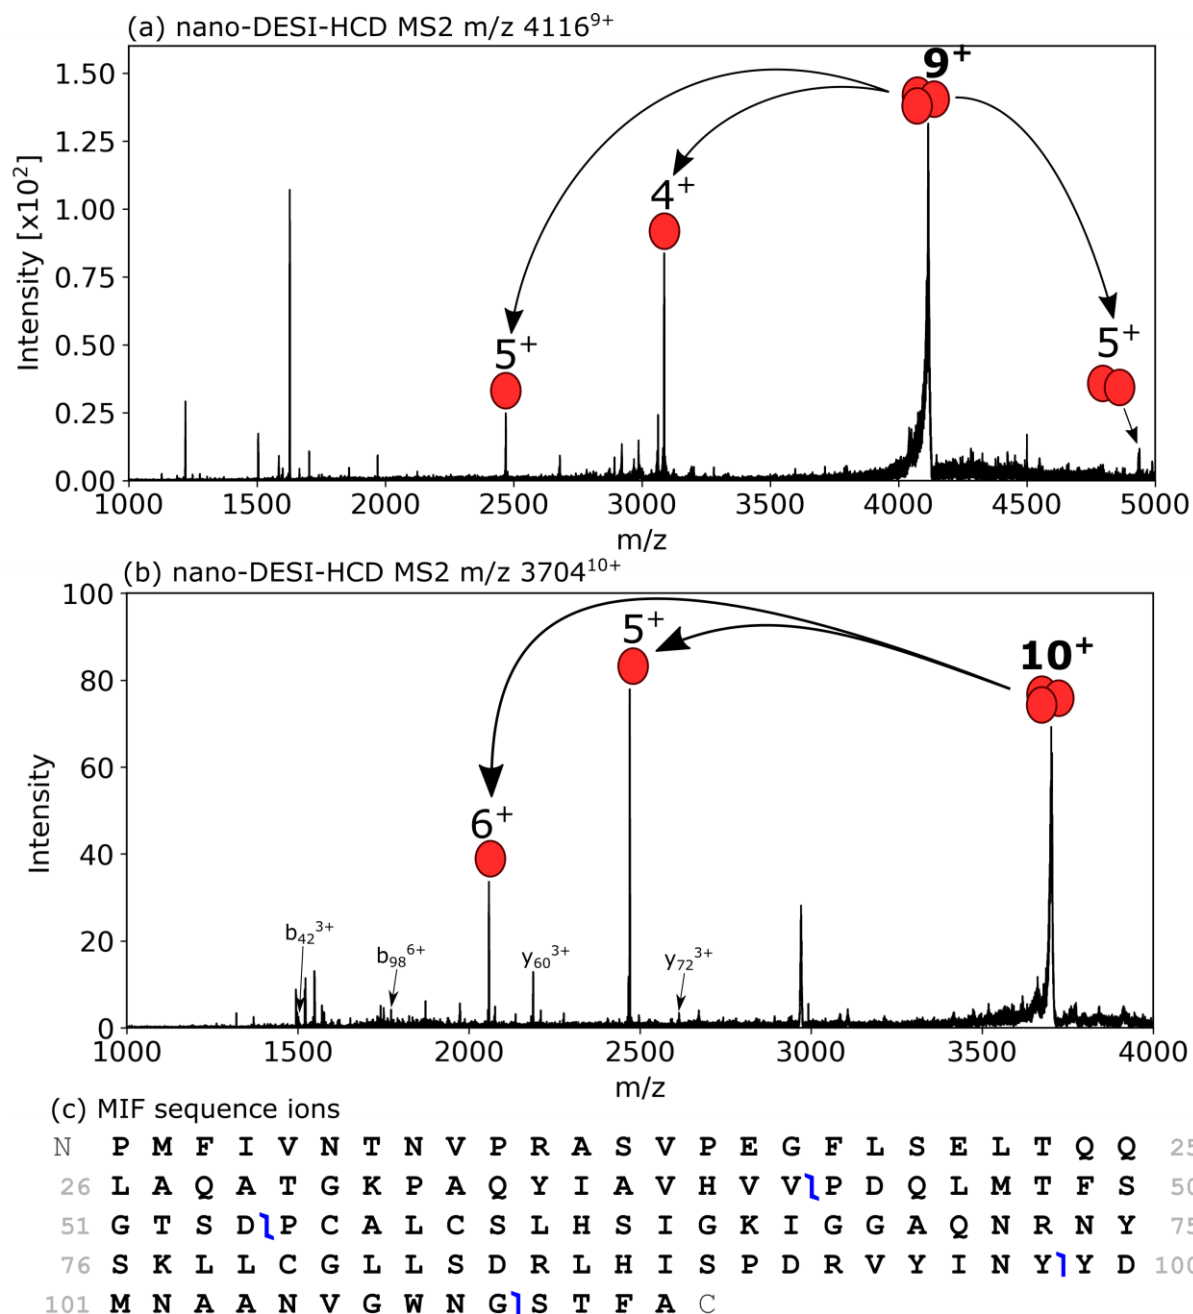

**Figure S2:** (a) nano-DESI-HCD MS2 of the 9+ (NCE = 45 – 46%) and (b) 10+ (NCE = 40%) charge state of macrophage inhibitory factor (MIF) homotrimer. Sequence ions are indicated for the 10+ charge state because of co-isolation of unrelated protein ion signals in the ion trap window for the 9+ charge state. Subunit ions confirm the assembly stoichiometry as homotrimeric. Mass spectra acquired on the Orbitrap Eclipse with an orbitrap resolution of 240,000 at  $m/z$  200 using a 200 mM ammonium acetate + 0.5x CMC C8E4 solvent system. (c) Sequence ions assigned with a mass tolerance of 20 ppm. P-score = 0.054 with 4 of 6 ions explained by cleavages at D and P residues.

Table S3: Sequence ions of MIF.

| Name        | Theoretical Mass (Da) | Observed Mass (Da) | Mass Difference (Da) | Mass Difference (ppm) |
|-------------|-----------------------|--------------------|----------------------|-----------------------|
| <b>b42</b>  | 4502.3784             | 4502.3108          | -0.0676              | -15.0                 |
| <b>b54</b>  | 5781.9174             | 5781.8294          | -0.0880              | -15.2                 |
| <b>b98</b>  | 10621.4061            | 10621.5618         | 0.1557               | 14.7                  |
| <b>b110</b> | 11913.9305            | 11914.0891         | 0.1586               | 13.3                  |
| <b>y60</b>  | 6556.2089             | 6556.1716          | -0.0373              | -5.7                  |
| <b>y72</b>  | 7835.7479             | 7835.6321          | -0.1158              | -14.8                 |

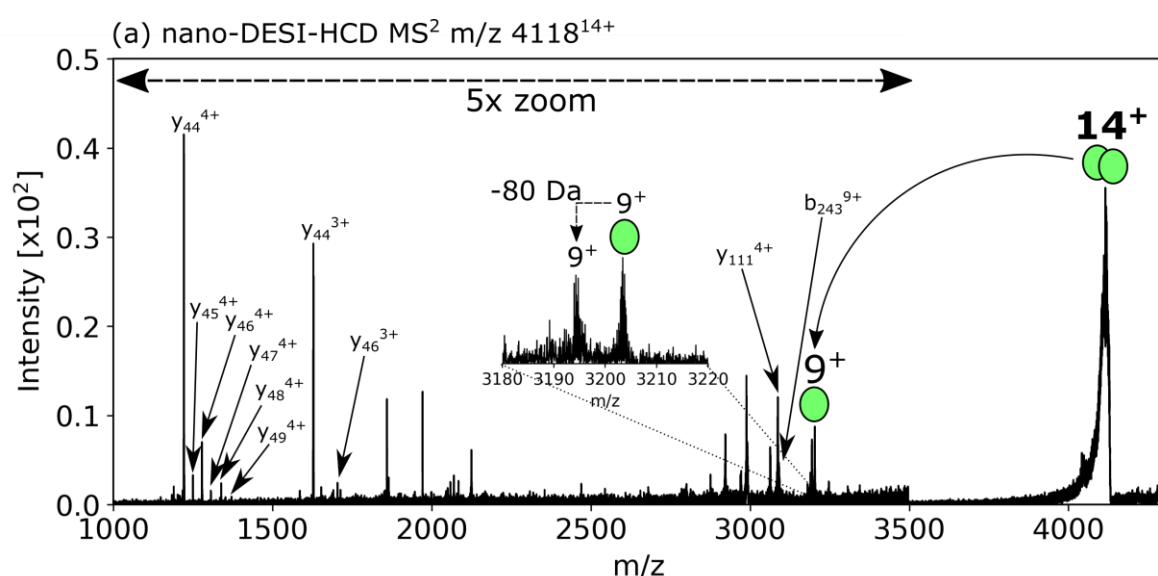

(b) PGAM1 sequence ions

|     |          |   |   |   |          |          |          |          |          |          |          |          |          |          |   |   |          |          |          |          |          |          |          |          |          |     |
|-----|----------|---|---|---|----------|----------|----------|----------|----------|----------|----------|----------|----------|----------|---|---|----------|----------|----------|----------|----------|----------|----------|----------|----------|-----|
| N   | <b>A</b> | A | Y | K | L        | V        | L        | I        | R        | H        | G        | E        | S        | A        | W | N | L        | E        | N        | R        | F        | S        | G        | W        | <b>Y</b> | 25  |
| 26  | D        | A | D | L | S        | P        | A        | G        | H        | E        | E        | A        | K        | R        | G | G | Q        | A        | L        | R        | D        | A        | G        | Y        | E        | 50  |
| 51  | F        | D | I | C | F        | T        | S        | V        | Q        | K        | R        | A        | I        | R        | T | L | W        | T        | V        | L        | D        | A        | I        | D        | Q        | 75  |
| 76  | M        | W | L | P | V        | V        | R        | T        | W        | R        | L        | N        | E        | R        | H | Y | G        | G        | L        | T        | G        | L        | N        | K        | A        | 100 |
| 101 | E        | T | A | A | K        | H        | G        | E        | A        | Q        | V        | K        | I        | W        | R | R | S        | Y        | D        | V        | P        | P        | P        | P        | M        | 125 |
| 126 | E        | P | D | H | P        | F        | Y        | S        | N        | I        | S        | K        | D        | R        | R | Y | <b>A</b> | <b>D</b> | L        | T        | E        | D        | Q        | L        | P        | 150 |
| 151 | S        | C | E | S | L        | K        | D        | T        | I        | A        | R        | A        | L        | P        | F | W | N        | E        | E        | I        | V        | P        | Q        | I        | K        | 175 |
| 176 | E        | G | K | R | V        | L        | I        | A        | A        | H        | G        | N        | S        | L        | R | G | I        | V        | K        | H        | L        | E        | G        | L        | S        | 200 |
| 201 | E        | E | A | I | <b>M</b> | <b>E</b> | <b>L</b> | <b>N</b> | <b>L</b> | <b>P</b> | <b>T</b> | <b>G</b> | <b>I</b> | <b>P</b> | I | V | Y        | E        | L        | D        | K        | N        | L        | K        | P        | 225 |
| 226 | I        | K | P | M | Q        | F        | L        | G        | D        | E        | E        | T        | V        | R        | K | A | <b>M</b> | <b>E</b> | <b>A</b> | <b>V</b> | <b>A</b> | <b>A</b> | <b>Q</b> | <b>G</b> | <b>K</b> | 250 |
| 251 | V        | K | K | C |          |          |          |          |          |          |          |          |          |          |   |   |          |          |          |          |          |          |          |          |          |     |

**Figure S3:** (a) nano-DESI-HCD MS<sup>2</sup> spectrum for phosphoglycerate mutase obtained with NCE = 20 – 25%. The intact mass is consistent with N-terminal acetylation (red highlight) and a single phosphorylation (blue highlight) situated towards the N-terminus. Spectrum acquired on the Orbitrap Eclipse with an orbitrap resolution of 240,000 at m/z 200 using a 200 mM ammonium acetate + 0.5x CMC C8E4 solvent system. (b) Sequence ions for PGAM1 assigned with a mass tolerance of 20 ppm. P-score = 0.067. 2 of 10 ions are explained by cleavages N-terminally to P-residues. The region I204 – P214 shows comprehensive cleavage, with the y44 ion showing as especially abundant. The precise phosphorylated residue was not determined due to the absence of identifiable b-ion signals, but is included on the Y-residue (highlighted in blue) as per annotations on Uniprot (P25113) due to the prevalence of neutral loss = 80 Da rather than 98 Da.



**Table S4: Sequence ions of PGAM1**

| <b>Name</b> | <b>Theoretical Mass (Da)</b> | <b>Observed Mass (Da)</b> | <b>Mass Difference (Da)</b> | <b>Mass Difference (ppm)</b> |
|-------------|------------------------------|---------------------------|-----------------------------|------------------------------|
| <b>y40</b>  | 4511.4647                    | 4511.4203                 | -0.0444                     | -9.9                         |
| <b>y42</b>  | 4681.5702                    | 4681.5313                 | -0.0390                     | -8.3                         |
| <b>y44</b>  | 4879.6707                    | 4879.6038                 | -0.0669                     | -13.7                        |
| <b>y45</b>  | 4992.7547                    | 4992.7020                 | -0.0527                     | -10.6                        |
| <b>y46</b>  | 5106.7977                    | 5106.7352                 | -0.0624                     | -12.2                        |
| <b>y47</b>  | 5219.8817                    | 5219.8276                 | -0.0541                     | -10.4                        |
| <b>y48</b>  | 5348.9243                    | 5348.8898                 | -0.0345                     | -6.4                         |
| <b>y49</b>  | 5479.9648                    | 5479.9110                 | -0.0538                     | -9.8                         |
| <b>y111</b> | 12337.3724                   | 12337.5840                | 0.2116                      | -17.1                        |
| <b>b243</b> | 27806.1813                   | 3090.6055                 | -0.2052                     | 7.4                          |

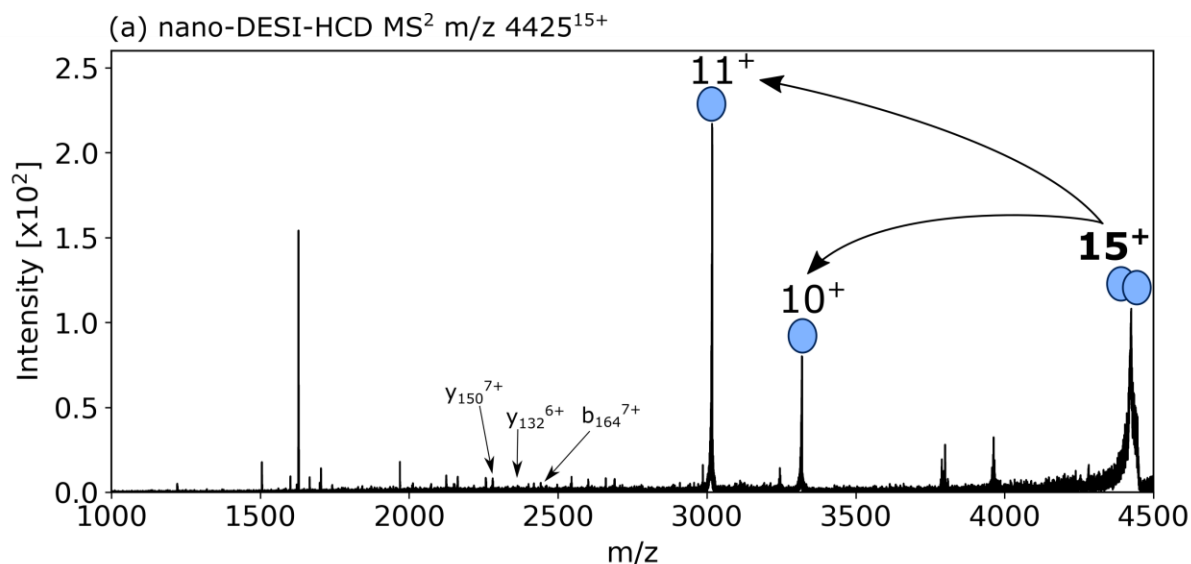

(b) MDH2 sequence ions

|     |   |   |   |   |   |   |   |   |   |   |   |   |   |   |   |   |   |   |   |   |   |   |   |   |   |     |
|-----|---|---|---|---|---|---|---|---|---|---|---|---|---|---|---|---|---|---|---|---|---|---|---|---|---|-----|
| N   | A | K | V | A | V | L | G | A | S | G | G | I | G | Q | P | L | S | L | L | L | K | N | S | P | L | 25  |
| 26  | V | S | R | L | T | L | Y | D | I | A | H | T | P | G | V | A | A | D | L | S | H | I | E | T | R | 50  |
| 51  | A | N | V | K | G | Y | L | G | P | E | Q | L | P | D | C | L | K | G | C | D | V | V | V | I | P | 75  |
| 76  | A | G | V | P | R | K | P | G | M | T | R | D | D | L | F | N | T | N | A | T | I | V | A | T | L | 100 |
| 101 | T | A | A | C | A | Q | H | C | P | E | A | M | I | C | I | I | S | N | P | V | N | S | T | I | P | 125 |
| 126 | I | T | A | E | V | F | K | K | H | G | V | Y | N | P | N | K | I | F | G | V | T | T | L | D | I | 150 |
| 151 | V | R | A | N | T | F | V | A | E | L | K | G | L | D | P | A | R | V | N | V | P | V | I | G | G | 175 |
| 176 | H | A | G | K | T | I | I | P | L | I | S | Q | C | T | P | K | V | D | F | P | Q | D | Q | L | A | 200 |
| 201 | T | L | T | G | R | I | Q | E | A | G | T | E | V | V | K | A | K | A | G | A | G | S | A | T | L | 225 |
| 226 | S | M | A | Y | A | G | A | R | F | V | F | S | L | V | D | A | M | N | G | K | E | G | V | I | E | 250 |
| 251 | C | S | F | V | Q | S | K | E | T | E | C | T | Y | F | S | T | P | L | L | L | G | K | K | G | L | 275 |
| 276 | E | K | N | L | G | I | G | K | I | T | P | F | E | E | K | M | I | A | E | A | I | P | E | L | K | 300 |
| 301 | A | S | I | K | K | G | E | D | F | V | K | N | M | K | C |   |   |   |   |   |   |   |   |   |   |     |

**Figure S4:** (a) nano-DESI-HCD MS<sup>2</sup> spectrum of m/z 4425<sup>15+</sup>, MDH2 homodimer, showing subunit ions in 11+ and 10+ charge states (NCE = 50%) and confirming assembly stoichiometry as homodimeric. Spectrum acquired on the Orbitrap Eclipse with an orbitrap resolution of 240,000 at m/z 200 using a 200 mM ammonium acetate + 0.5x CMC C8E4 solvent system. (b) Sequence ions assigned with a mass tolerance of 20 ppm. P-score = 0.13. 7 of 9 ions are explained by cleavage at D or P residues. There is some fragment ion overlap with the MDH2 identified in the kidney by nESI (Figure S11).

**Table S5:** sequence ions for MDH2.

| Name        | Theoretical Mass (Da) | Observed Mass (Da) | Mass Difference (Da) | Mass Difference (ppm) |
|-------------|-----------------------|--------------------|----------------------|-----------------------|
| <b>b124</b> | 12816.7017            | 12816.6559         | -0.0458              | -3.6                  |
| <b>b130</b> | 13427.0343            | 13426.9893         | -0.0450              | -3.3                  |
| <b>b164</b> | 17213.0963            | 17213.0173         | -0.0790              | -4.6                  |
| <b>b182</b> | 18993.1434            | 18993.1327         | -0.0107              | -0.6                  |
| <b>y132</b> | 14168.3591            | 14168.2997         | -0.0594              | -4.2                  |
| <b>y150</b> | 15948.4062            | 15948.3493         | -0.0569              | -3.6                  |
| <b>y180</b> | 19194.1510            | 19194.0491         | -0.1019              | -5.3                  |
| <b>y190</b> | 20344.8008            | 20344.7192         | -0.0816              | -4.0                  |
| <b>y206</b> | 22027.6380            | 22027.5247         | -0.1133              | -5.1                  |

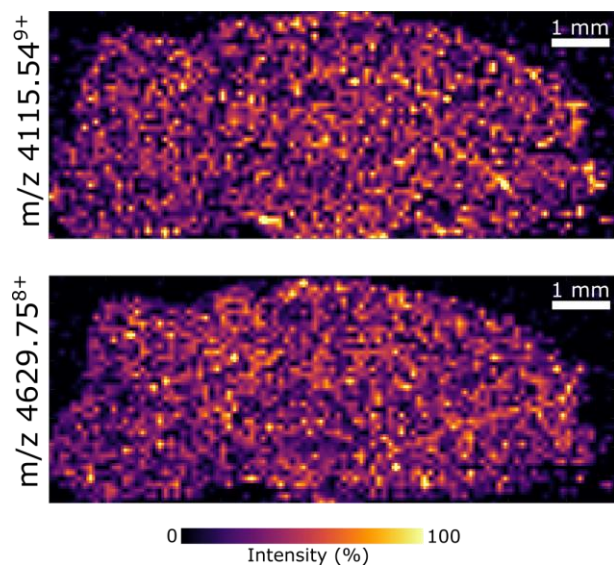

**Figure S5:** Ion images for 9+ and 8+ charge states of MIF showing homogenous distribution.

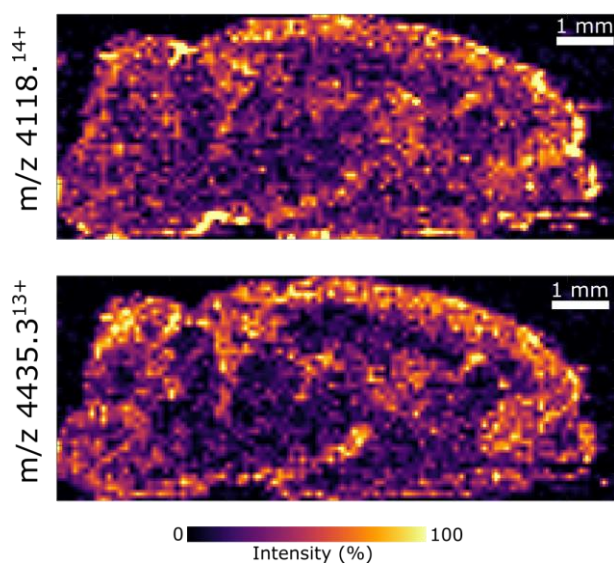

**Figure S6:** Ion images for 14+ and 13+ charge states of PGAM1 showing distribution in regions such as the cerebral cortex.

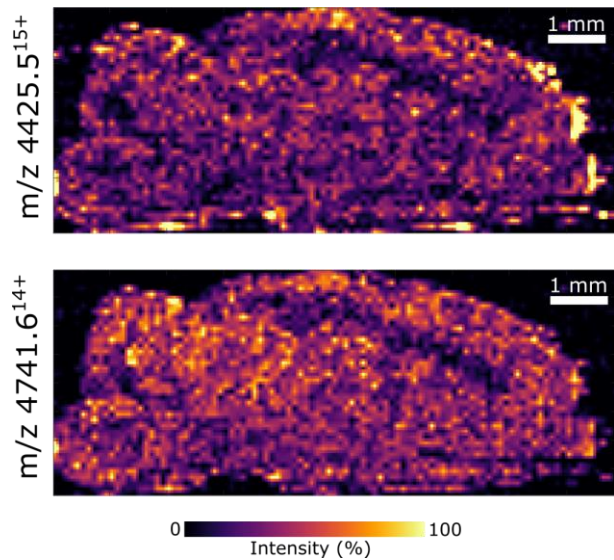

**Figure S7:** Ion images for 15+ and 14+ charge states of MDH2 showing distribution amongst grey matter.

Rat kidney:

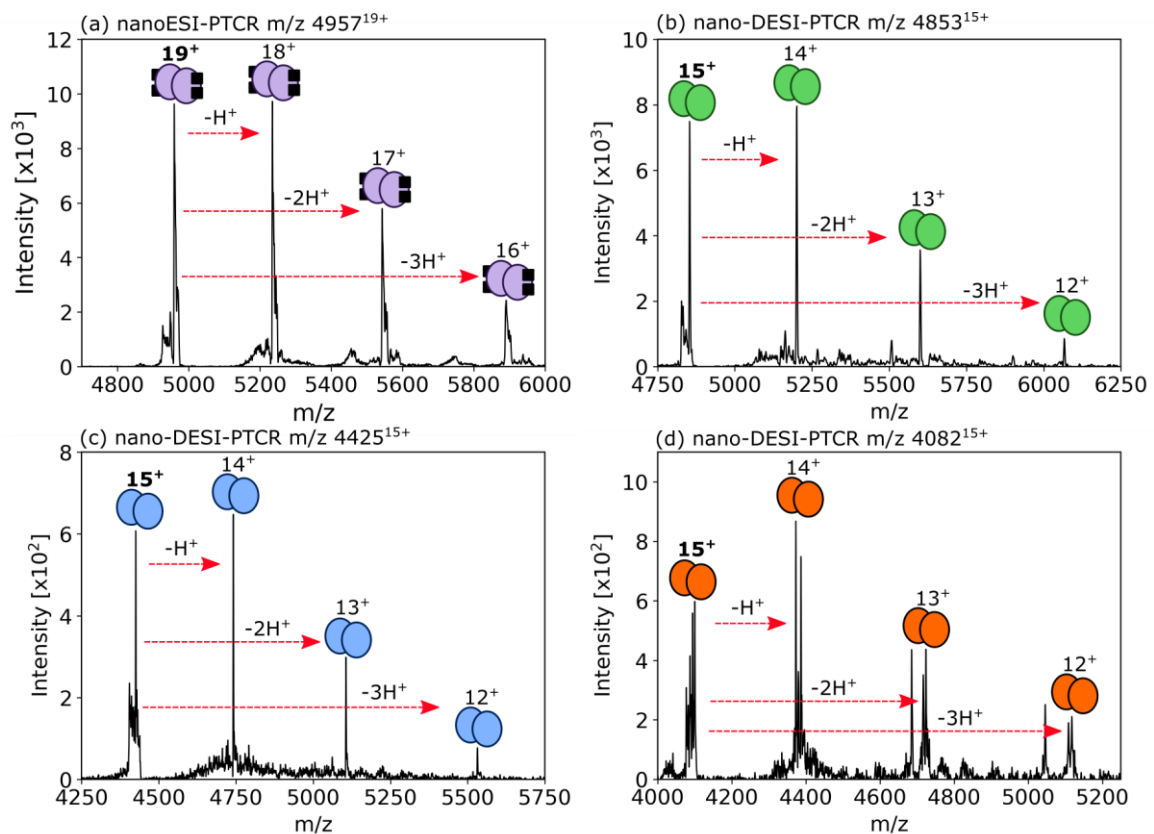

**Figure S8: Determination of intact mass of kidney protein assemblies.** (a) nanoESI-PTCR MS<sup>2</sup> spectrum of m/z 4957 indicating precursor ions in the 19+ charge state. (b) nano-DESI-PTCR MS<sup>2</sup> spectrum of m/z 4853 indicating precursor ions in the 15+ charge state (approx. 72.8 kDa). (c) nano-DESI-PTCR MS<sup>2</sup> spectrum for m/z 4425 indicating precursor ions in the 15+ charge state (approx. 66.3 kDa). (d) nano-DESI-PTCR MS<sup>2</sup> spectrum for m/z 4082 indicating precursor ions in the 15+ charge state (approx. 61.3 kDa). PTCR spectra were acquired with an orbitrap resolution of 7500 at m/z 200.



**Table S6: sequence ions for  $\alpha$ -enolase**

| <b>Name</b> | <b>Theoretical Mass (Da)</b> | <b>Observed Mass (Da)</b> | <b>Mass Difference (Da)</b> | <b>Mass Difference (ppm)</b> |
|-------------|------------------------------|---------------------------|-----------------------------|------------------------------|
| <b>b12</b>  | 1464.8089                    | 1464.7992                 | -0.0096                     | -6.6                         |
| <b>b52</b>  | 5698.9382                    | 5698.9239                 | -0.0143                     | -2.5                         |
| <b>b59</b>  | 6547.4073                    | 6547.3621                 | -0.0452                     | -6.9                         |
| <b>b66</b>  | 7217.7723                    | 7217.6770                 | -0.0953                     | -13.2                        |
| <b>b68</b>  | 7467.9153                    | 7467.8704                 | -0.0449                     | -6.0                         |
| <b>b73</b>  | 7995.2220                    | 7995.1307                 | -0.0913                     | -11.4                        |
| <b>b84</b>  | 9143.9501                    | 9143.8183                 | -0.1318                     | -14.4                        |
| <b>b96</b>  | 10631.6501                   | 10631.5405                | -0.1096                     | -10.3                        |
| <b>b97</b>  | 10746.6770                   | 10746.5348                | -0.1423                     | -13.2                        |
| <b>b98</b>  | 10813.0164                   | 10813.0884                | -0.0720                     | 6.7                          |
| <b>b101</b> | 11147.8317                   | 11147.6309                | -0.2007                     | -18.0                        |
| <b>b119</b> | 12934.8444                   | 12934.7204                | -0.1240                     | -9.6                         |
| <b>b121</b> | 13062.9030                   | 13062.7301                | -0.1729                     | -13.2                        |
| <b>b123</b> | 13233.0085                   | 13232.8609                | -0.1476                     | -11.2                        |
| <b>b124</b> | 13362.0511                   | 13361.8760                | -0.1751                     | -13.1                        |
| <b>b125</b> | 13490.1460                   | 13489.9080                | -0.2380                     | -17.6                        |
| <b>b135</b> | 14622.2267                   | 14622.1430                | 0.0837                      | -5.7                         |
| <b>b139</b> | 14966.9298                   | 14966.8227                | -0.1071                     | -7.2                         |
| <b>b144</b> | 15518.2616                   | 15518.1042                | -0.1575                     | -10.1                        |
| <b>b146</b> | 15714.3828                   | 15714.2580                | -0.1248                     | -7.9                         |
| <b>b202</b> | 21855.3286                   | 21855.1922                | 0.1364                      | -6.2                         |
| <b>b208</b> | 22399.7612                   | 22399.4078                | -0.3534                     | -15.8                        |
| <b>b257</b> | 27657.3870                   | 27657.4242                | -0.0372                     | 1.3                          |
| <b>b259</b> | 27885.4986                   | 27885.5358                | -0.0372                     | 1.3                          |
| <b>b264</b> | 28459.7730                   | 28459.8066                | -0.0336                     | 1.2                          |
| <b>y48</b>  | 5304.8451                    | 5304.7491                 | -0.0960                     | -18.1                        |
| <b>y49</b>  | 5409.7373                    | 5409.7063                 | 0.0310                      | -5.7                         |
| <b>y50</b>  | 5508.8058                    | 5508.7558                 | 0.0500                      | -9.1                         |
| <b>y53</b>  | 5802.1301                    | 5802.0912                 | -0.0389                     | -6.7                         |
| <b>y101</b> | 10993.6499                   | 10993.7733                | 0.1233                      | 11.2                         |
| <b>y123</b> | 13197.8776                   | 13197.7840                | -0.0936                     | -7.1                         |



Table S7: sequence ions for MDH1

| Name        | Theoretical Mass (Da) | Observed Mass (Da) | Mass Difference (Da) | Mass Difference (ppm) |
|-------------|-----------------------|--------------------|----------------------|-----------------------|
| <b>b8</b>   | 935.5440              | 935.5474           | 0.0034               | 3.6                   |
| <b>b11</b>  | 1164.6505             | 1164.6491          | 0.0014               | -1.2                  |
| <b>b12</b>  | 1235.6874             | 1235.6807          | -0.0066              | -5.4                  |
| <b>b15</b>  | 1533.8515             | 1533.8561          | 0.0047               | 3.0                   |
| <b>b16</b>  | 1604.8886             | 1604.8936          | 0.0051               | 3.2                   |
| <b>b17</b>  | 1767.9519             | 1767.9542          | 0.0023               | 1.3                   |
| <b>b20</b>  | 2081.1520             | 2081.1421          | -0.0100              | -4.8                  |
| <b>b23</b>  | 2444.3315             | 2444.2989          | -0.0326              | -13.3                 |
| <b>b32</b>  | 3305.7295             | 3305.7335          | 0.0039               | 1.2                   |
| <b>b33</b>  | 3433.7881             | 3433.7672          | -0.0209              | -6.1                  |
| <b>b35</b>  | 3643.9249             | 3643.9112          | -0.0137              | -3.8                  |
| <b>b36</b>  | 3757.0090             | 3756.9844          | -0.0246              | -6.6                  |
| <b>b37</b>  | 3870.0930             | 3870.0817          | -0.0114              | -2.9                  |
| <b>b38</b>  | 3969.1615             | 3969.1603          | -0.0011              | -0.3                  |
| <b>b39</b>  | 4082.2455             | 4082.2462          | 0.0007               | 0.2                   |
| <b>b40</b>  | 4195.3296             | 4195.3127          | -0.0169              | -4.0                  |
| <b>b41</b>  | 4310.3565             | 4310.3656          | 0.0091               | 2.1                   |
| <b>b42</b>  | 4423.4406             | 4423.4107          | -0.0299              | -6.8                  |
| <b>b43</b>  | 4524.4883             | 4524.4536          | -0.0347              | -7.7                  |
| <b>b50</b>  | 5267.8229             | 5267.7479          | -0.0750              | -14.2                 |
| <b>b58</b>  | 6153.2495             | 6153.1801          | -0.0694              | -11.3                 |
| <b>b120</b> | 12992.9401            | 12992.9429         | 0.0028               | 0.2                   |
| <b>b130</b> | 14016.5860            | 14016.6045         | -0.0185              | 1.3                   |
| <b>y27</b>  | 3136.5274             | 3136.5137          | -0.0137              | -4.4                  |
| <b>y51</b>  | 5938.0793             | 5938.0832          | 0.0039               | 0.7                   |
| <b>y52</b>  | 6053.1063             | 6053.0942          | -0.0121              | -2.0                  |
| <b>y60</b>  | 6842.4356             | 6842.3604          | -0.0752              | -11.0                 |



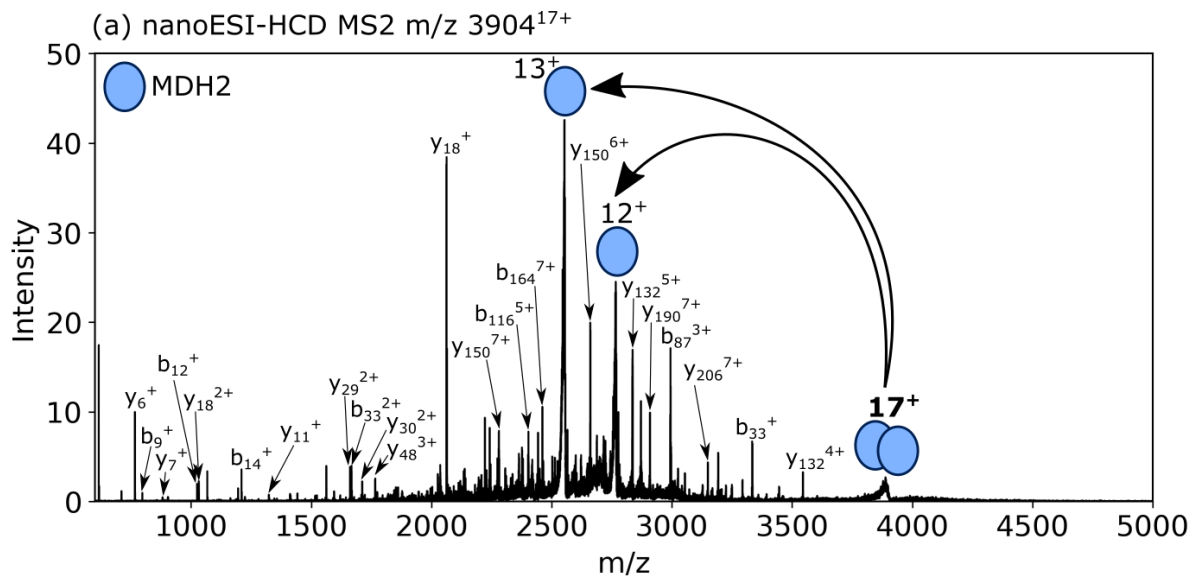

(b) MDH2 sequence ions

```

N   A K V A V L G A S I G G I G Q P L S L L L K N S P L   25
26  V S R L T L Y D I A H T P G V A A D L S H I E T R   50
51  A N V K G Y L G P E Q L P D C L K G C D V V V I P   75
76  A G V P R K P G M T R D D L F N T N A T I V A T L 100
101 T A A C A Q H C P E A M I C I I S N P V N S T I P 125
126 I T A E V F K K H G V Y N P N K I F G V T T L D I 150
151 V R A N T F V A E L K G L D P A R V N V P V I G G 175
176 H A G K T I I P L I S Q C T P K V D F P Q D Q L A 200
201 T L T G R I Q E A G T E V V K A K A G A G S A T L 225
226 S M A Y A G A R F V F S L V D A M N G K E G V I E 250
251 C S F V Q S K E T E C T Y F S T P L L L G K K G L 275
276 E K N L G I G K I T P F E E K M I A E A I P E L K 300
301 A S I K K G E D F V K N M K C

```

**Figure S11:** (a) nanoESI-HCD MS<sup>2</sup> spectrum of MDH2 showing subunits and sequence ion signals. Subunit ions confirm the assembly stoichiometry as homodimeric. Spectrum acquired on the QE-HF with an orbitrap resolution of 120,000 at m/z 200. (b) sequence ions of MDH2 assigned with a mass tolerance of 20 ppm. P-score = 2.8e-44. 21 of 61 ions are explained by cleavage at D or P residues. Data were acquired on the QE-HF, NCE = 26%, in 200 mM aqueous ammonium acetate + 2x CMC LDAO.

Table S8: sequence ions for MDH2

| Name        | Theoretical Mass (Da) | Observed Mass (Da) | Mass Difference (Da) | Mass Difference (ppm) |
|-------------|-----------------------|--------------------|----------------------|-----------------------|
| <b>b8</b>   | 709.4486              | 709.4516           | 0.0030               | 4.2                   |
| <b>b9</b>   | 796.4807              | 796.4837           | 0.0031               | 3.9                   |
| <b>b12</b>  | 1023.6076             | 1023.6007          | -0.0070              | -6.8                  |
| <b>b14</b>  | 1208.6877             | 1208.6928          | 0.0051               | 4.2                   |
| <b>b33</b>  | 3331.9231             | 3331.8772          | -0.0459              | -13.8                 |
| <b>b64</b>  | 6582.5965             | 6582.6395          | 0.0431               | 6.5                   |
| <b>b67</b>  | 6926.7847             | 6926.7558          | -0.0289              | -4.2                  |
| <b>b70</b>  | 7201.8423             | 7201.7894          | -0.0529              | -7.3                  |
| <b>b87</b>  | 8974.8506             | 8974.8402          | -0.0104              | -1.2                  |
| <b>b88</b>  | 9089.8775             | 9089.8829          | 0.0054               | 0.6                   |
| <b>b106</b> | 10893.7964            | 10893.7466         | -0.0498              | -4.6                  |
| <b>b107</b> | 11030.8553            | 11030.8523         | -0.0030              | -0.3                  |
| <b>b108</b> | 11133.8645            | 11133.7957         | -0.0688              | -6.2                  |
| <b>b112</b> | 11562.0375            | 11561.9269         | -0.1105              | -9.6                  |
| <b>b115</b> | 11891.2148            | 11891.1617         | -0.0531              | -4.5                  |
| <b>b116</b> | 12004.2988            | 12004.2738         | -0.0250              | -2.1                  |
| <b>b118</b> | 12205.3738            | 12205.3202         | -0.0536              | -4.4                  |
| <b>b124</b> | 12816.7017            | 12816.5978         | -0.1039              | -8.1                  |
| <b>b130</b> | 13427.0343            | 13426.8845         | -0.1497              | -11.2                 |
| <b>b164</b> | 17213.0963            | 17212.9301         | -0.1662              | -9.7                  |
| <b>b182</b> | 18993.1434            | 18992.9855         | -0.1579              | -8.3                  |
| <b>y6</b>   | 765.4207              | 765.4236           | 0.0029               | 3.8                   |
| <b>y7</b>   | 880.4477              | 880.4459           | -0.0017              | -2.0                  |
| <b>y11</b>  | 1322.7019             | 1322.6998          | 0.0021               | -1.6                  |
| <b>y14</b>  | 1593.8548             | 1593.8408          | -0.0141              | -8.8                  |
| <b>y18</b>  | 2061.1292             | 2061.1107          | -0.0185              | -9.0                  |
| <b>y20</b>  | 2245.2504             | 2245.2596          | 0.0092               | 4.1                   |
| <b>y21</b>  | 2374.2930             | 2374.2635          | -0.0295              | -12.4                 |
| <b>y22</b>  | 2445.3301             | 2445.3249          | -0.0051              | -2.1                  |
| <b>y23</b>  | 2558.4141             | 2558.4003          | -0.0138              | -5.4                  |
| <b>y24</b>  | 2689.4546             | 2689.4514          | -0.0033              | -1.2                  |
| <b>y26</b>  | 2946.5922             | 2946.5802          | -0.0119              | -4.1                  |
| <b>y29</b>  | 3319.7559             | 3319.7565          | 0.0006               | 0.2                   |
| <b>y30</b>  | 3420.8036             | 3420.7723          | -0.0314              | -9.2                  |
| <b>y31</b>  | 3533.8877             | 3533.8903          | 0.0026               | 0.7                   |
| <b>y33</b>  | 3719.0041             | 3718.9926          | -0.0115              | -3.1                  |
| <b>y35</b>  | 3889.1096             | 3889.0749          | -0.0348              | -8.9                  |
| <b>y37</b>  | 4116.2366             | 4116.2203          | -0.0163              | -4.0                  |
| <b>y41</b>  | 4543.4797             | 4543.4546          | -0.0251              | -5.5                  |
| <b>y44</b>  | 4856.6911             | 4856.6697          | -0.0214              | -4.4                  |
| <b>y48</b>  | 5292.9960             | 5292.9648          | -0.0312              | -5.9                  |
| <b>y49</b>  | 5394.0437             | 5394.0297          | -0.0140              | -2.6                  |

|      |            |            |         |       |
|------|------------|------------|---------|-------|
| y50  | 5481.0757  | 5481.0439  | -0.0319 | -5.8  |
| y54  | 5995.2643  | 5995.2021  | -0.0622 | -10.4 |
| y56  | 6225.3546  | 6225.3254  | -0.0292 | -4.7  |
| y57  | 6354.3972  | 6354.3919  | -0.0053 | -0.8  |
| y59  | 6569.5242  | 6569.4830  | -0.0412 | -6.3  |
| y60  | 6697.5827  | 6697.5305  | -0.0522 | -7.8  |
| y61  | 6796.6512  | 6796.6061  | -0.0451 | -6.6  |
| y68  | 7531.9773  | 7531.9224  | -0.0549 | -7.3  |
| y96  | 10334.3242 | 10334.2450 | -0.0792 | -7.7  |
| y97  | 10405.3613 | 10405.2900 | -0.0712 | -6.8  |
| y114 | 12187.3612 | 12187.2128 | -0.1484 | -12.2 |
| y117 | 12499.5409 | 12499.4693 | -0.0717 | -5.7  |
| y125 | 13425.9907 | 13425.9533 | -0.0375 | -2.8  |
| y132 | 14168.3591 | 14168.3513 | -0.0078 | -0.5  |
| y150 | 15948.4062 | 15948.3854 | -0.0208 | -1.3  |
| y181 | 19331.2099 | 19331.1069 | -0.1029 | -5.3  |
| y190 | 20344.8035 | 20344.8329 | -0.0294 | 1.4   |
| y198 | 21157.2036 | 21157.0005 | -0.2031 | -9.6  |
| y206 | 22027.6406 | 22027.6861 | -0.0455 | 2.1   |

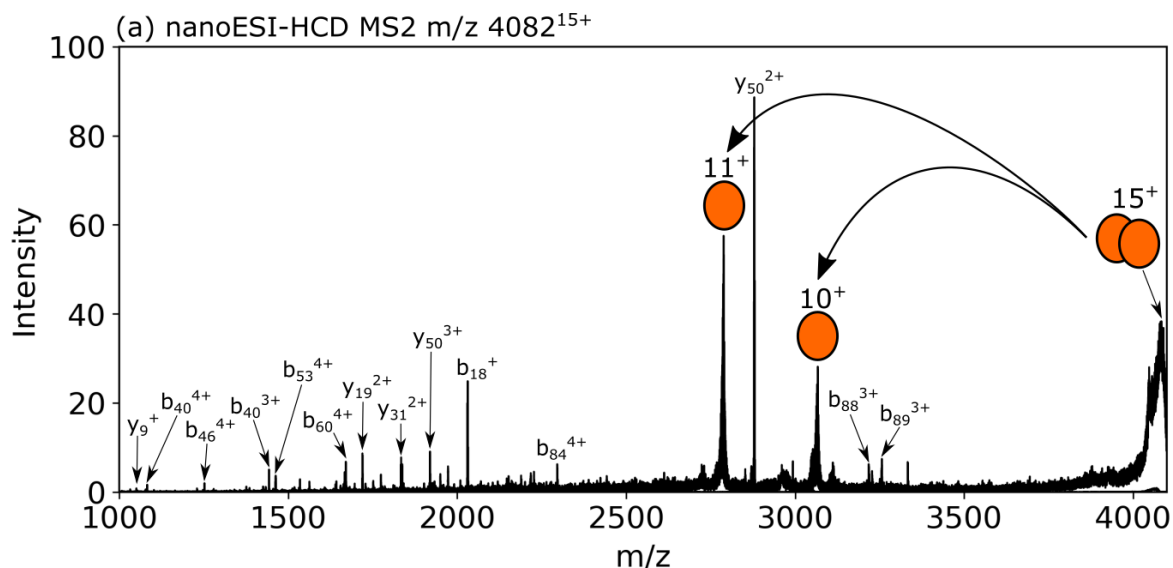

(b) omega-amidase sequence ions

|     |          |   |   |   |   |   |   |   |   |   |   |   |   |   |   |   |   |   |   |   |   |   |   |   |   |     |
|-----|----------|---|---|---|---|---|---|---|---|---|---|---|---|---|---|---|---|---|---|---|---|---|---|---|---|-----|
| N   | <b>S</b> | T | F | R | L | A | L | I | Q | L | Q | V | S | S | I | K | S | D | N | I | T | R | A | C | S | 25  |
| 26  | L        | V | R | E | A | A | K | Q | G | A | N | I | V | S | L | P | E | C | F | N | S | P | Y | G | T | 50  |
| 51  | N        | Y | F | P | E | Y | A | E | K | I | P | G | E | S | T | K | K | L | S | E | V | A | K | E | N | 75  |
| 76  | S        | I | Y | L | I | G | G | S | I | P | E | E | D | D | G | K | L | Y | N | T | C | A | V | F | G | 100 |
| 101 | P        | D | G | N | L | L | V | K | H | R | K | I | H | L | F | D | I | D | V | P | G | K | I | T | F | 125 |
| 126 | Q        | E | S | K | T | L | S | P | G | D | S | F | S | T | F | D | T | P | Y | C | R | V | G | L | G | 150 |
| 151 | I        | C | Y | D | M | R | F | A | E | L | A | Q | I | Y | A | R | R | G | C | Q | L | L | V | Y | P | 175 |
| 176 | G        | A | F | N | M | T | T | G | P | A | H | W | E | L | L | Q | R | A | R | A | V | D | N | Q | V | 200 |
| 201 | Y        | V | A | T | A | S | P | A | R | D | E | K | A | S | Y | V | A | W | G | H | S | T | V | V | D | 225 |
| 226 | P        | W | G | Q | V | L | T | K | A | G | T | E | E | T | I | L | Y | S | D | I | D | L | K | K | L | 250 |
| 251 | S        | E | I | R | Q | Q | I | P | I | L | K | Q | K | R | A | D | L | Y | S | V | E | S | K | K | P | 275 |

**Figure S12:** (a) nano-ESI-HCD MS2 spectrum showing subunit signals and sequence ions of omega-amidase. Subunit ions confirm the assembly stoichiometry as homodimeric.. (b) Sequence ions of N-terminally acetylated omega-amidase automatically assigned with a mass tolerance of 20 ppm. P-score = 3.3e-15. 14 of 31 ions are explained by cleavage at D or P residues. Data were acquired on the Orbitrap Eclipse, (NCE = 46 – 55%) using a 200 mM ammonium acetate + 0.5x CMC C8E4 solvent system.

Table S9: sequence ions for omega-amidase

| Name        | Theoretical Mass (Da) | Observed Mass (Da) | Mass Difference (Da) | Mass Difference (ppm) |
|-------------|-----------------------|--------------------|----------------------|-----------------------|
| <b>b18</b>  | 2029.1208             | 2029.1123          | -0.0085              | -4.2                  |
| <b>b37</b>  | 4025.1844             | 4025.1479          | -0.0365              | -9.1                  |
| <b>b38</b>  | 4124.2528             | 4124.2083          | -0.0444              | -10.8                 |
| <b>b40</b>  | 4324.3689             | 4324.3262          | -0.0427              | -9.9                  |
| <b>b42</b>  | 4550.4642             | 4550.4378          | -0.0265              | -5.8                  |
| <b>b44</b>  | 4800.5418             | 4800.4908          | -0.0510              | -10.6                 |
| <b>b45</b>  | 4914.5847             | 4914.5425          | -0.0423              | -8.6                  |
| <b>b46</b>  | 5001.6168             | 5001.5996          | -0.0172              | -3.4                  |
| <b>b49</b>  | 5318.7543             | 5318.7069          | -0.0475              | -8.9                  |
| <b>b51</b>  | 5533.8449             | 5533.7869          | -0.0580              | -10.5                 |
| <b>b53</b>  | 5843.9767             | 5843.9466          | -0.0301              | -5.1                  |
| <b>b58</b>  | 6433.2151             | 6433.1711          | -0.0439              | -6.8                  |
| <b>b59</b>  | 6561.3100             | 6561.2365          | -0.0735              | -11.2                 |
| <b>b60</b>  | 6674.3941             | 6674.3311          | -0.0630              | -9.4                  |
| <b>b71</b>  | 7830.0076             | 7829.9635          | -0.0441              | -5.6                  |
| <b>b73</b>  | 8029.1397             | 8029.0828          | -0.0568              | -7.1                  |
| <b>b74</b>  | 8158.1823             | 8158.1063          | -0.0759              | -9.3                  |
| <b>b76</b>  | 8359.2572             | 8359.2038          | -0.0534              | -6.4                  |
| <b>b78</b>  | 8635.4046             | 8635.3360          | -0.0686              | -7.9                  |
| <b>b79</b>  | 8748.4887             | 8748.3975          | -0.0912              | -10.4                 |
| <b>b80</b>  | 8861.5727             | 8861.4898          | -0.0830              | -9.4                  |
| <b>b81</b>  | 8918.5942             | 8918.5110          | -0.0831              | -9.3                  |
| <b>b84</b>  | 9175.7317             | 9175.6589          | -0.0729              | -7.9                  |
| <b>b88</b>  | 9645.8966             | 9645.8248          | -0.0719              | -7.4                  |
| <b>b89</b>  | 9760.9236             | 9760.8289          | -0.0947              | -9.7                  |
| <b>b141</b> | 15494.8528            | 15494.6840         | -0.1688              | -10.9                 |
| <b>y9</b>   | 1049.5760             | 1050.6445          | -1.0685              | -6.8                  |
| <b>y29</b>  | 3436.0293             | 3435.9857          | -0.0436              | -12.7                 |
| <b>y31</b>  | 3664.1403             | 3664.0969          | -0.0434              | -11.8                 |
| <b>y50</b>  | 5753.1770             | 5753.1382          | -0.0389              | -6.8                  |
| <b>y121</b> | 13657.1237            | 13656.9793         | -0.1443              | -10.6                 |

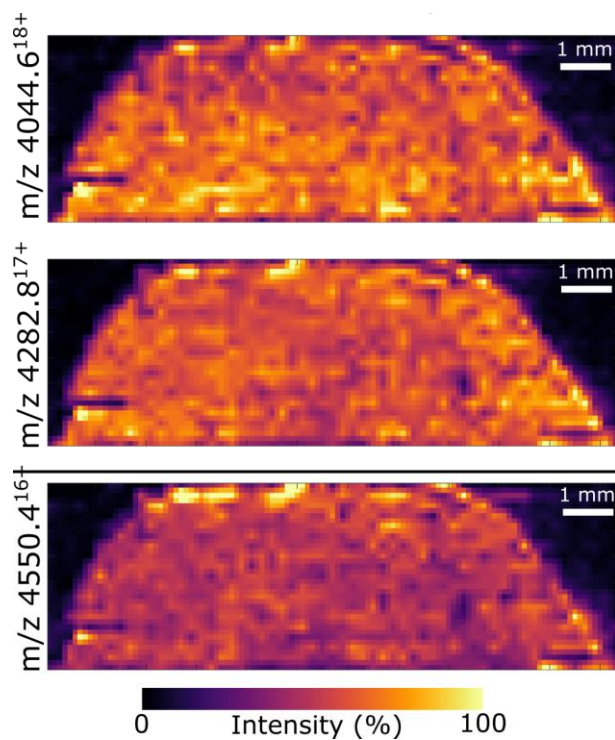

**Figure S13:** ion images for the 18+, 17+ and 16+ charge states of the MDH1 homodimer showing homogenous distribution.

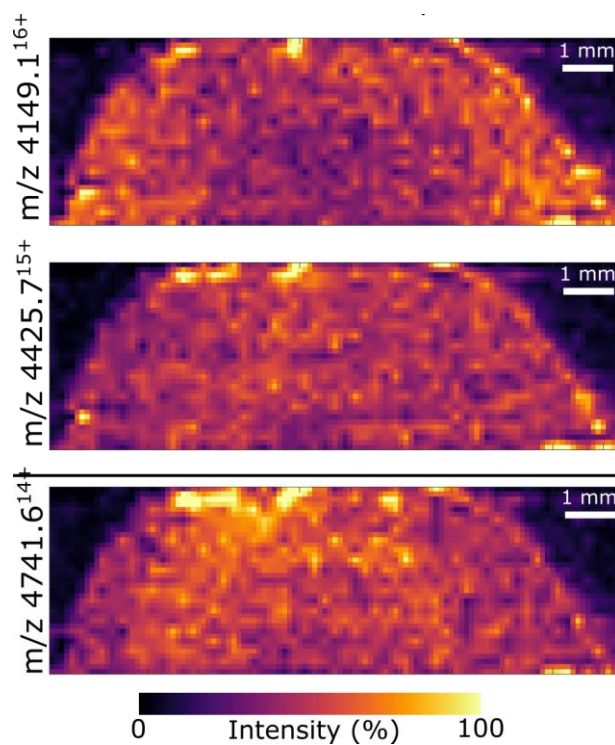

**Figure S14:** ion images for the 16+, 15+ and 14+ charge states of MDH2 showing homogenous distribution.

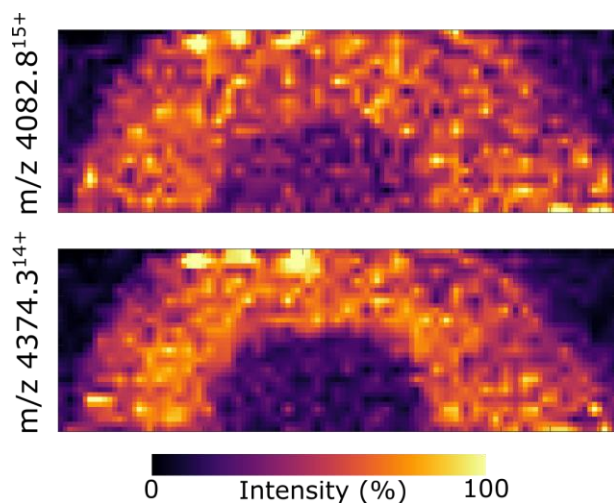

**Figure S15:** ion images for 15+ and 14+ charge states of omega-amidase homodimer showing distribution throughout cortex tissue.

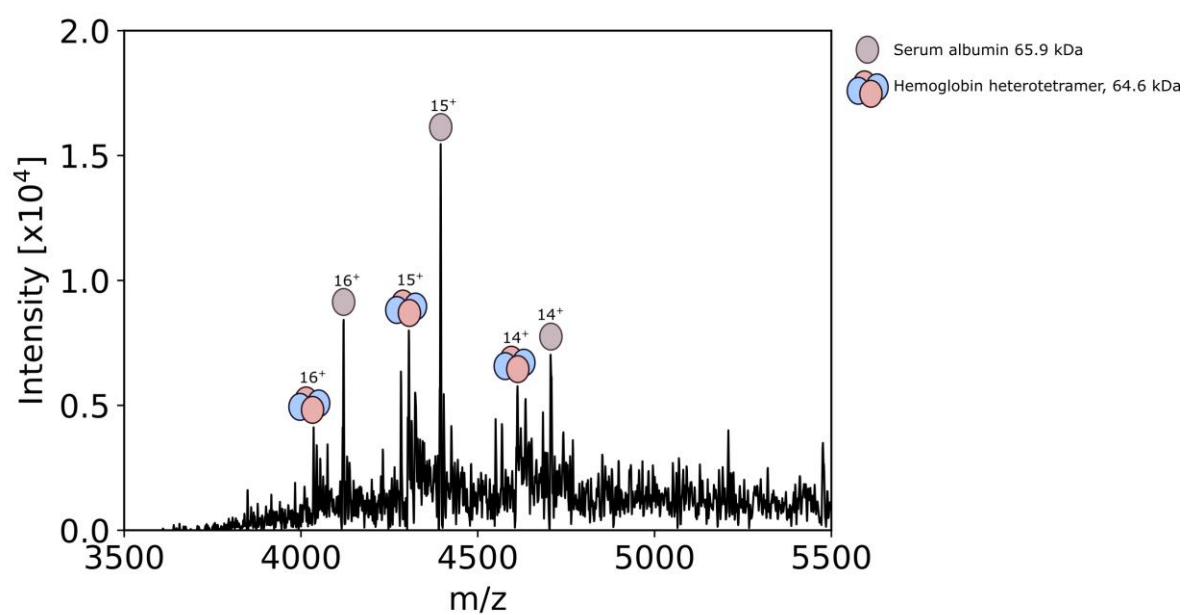

**Figure S16:** native mass spectrum composed of the average signals from 12 scans in a vascular region by nano-DESI. Signals for serum albumin and intact hemoglobin heterotetramer dominate the spectrum.

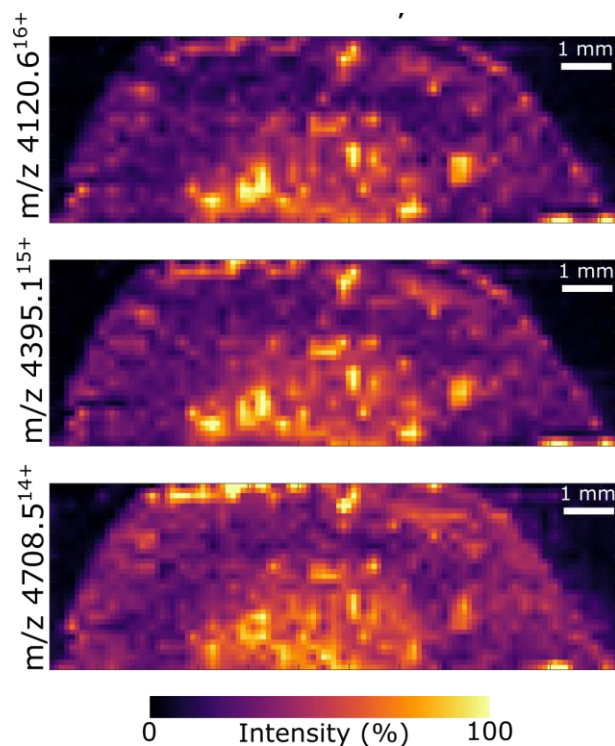

**Figure S17:** ion images for 16+, 15+ and 14+ charge states of serum albumin showing distribution in vascular regions and the medulla.

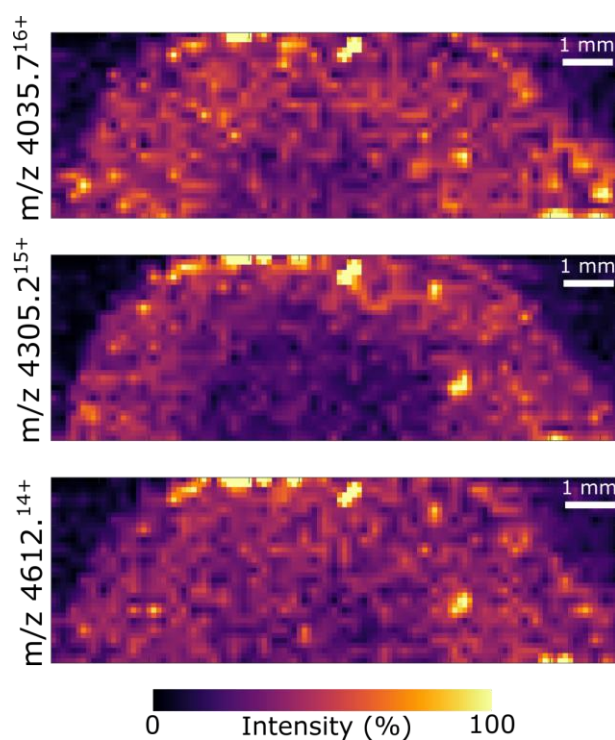

**Figure S18:** ion images for 16+, 15+ and 14+ charge states of hemoglobin heterotetramer showing distribution in blood vessels.



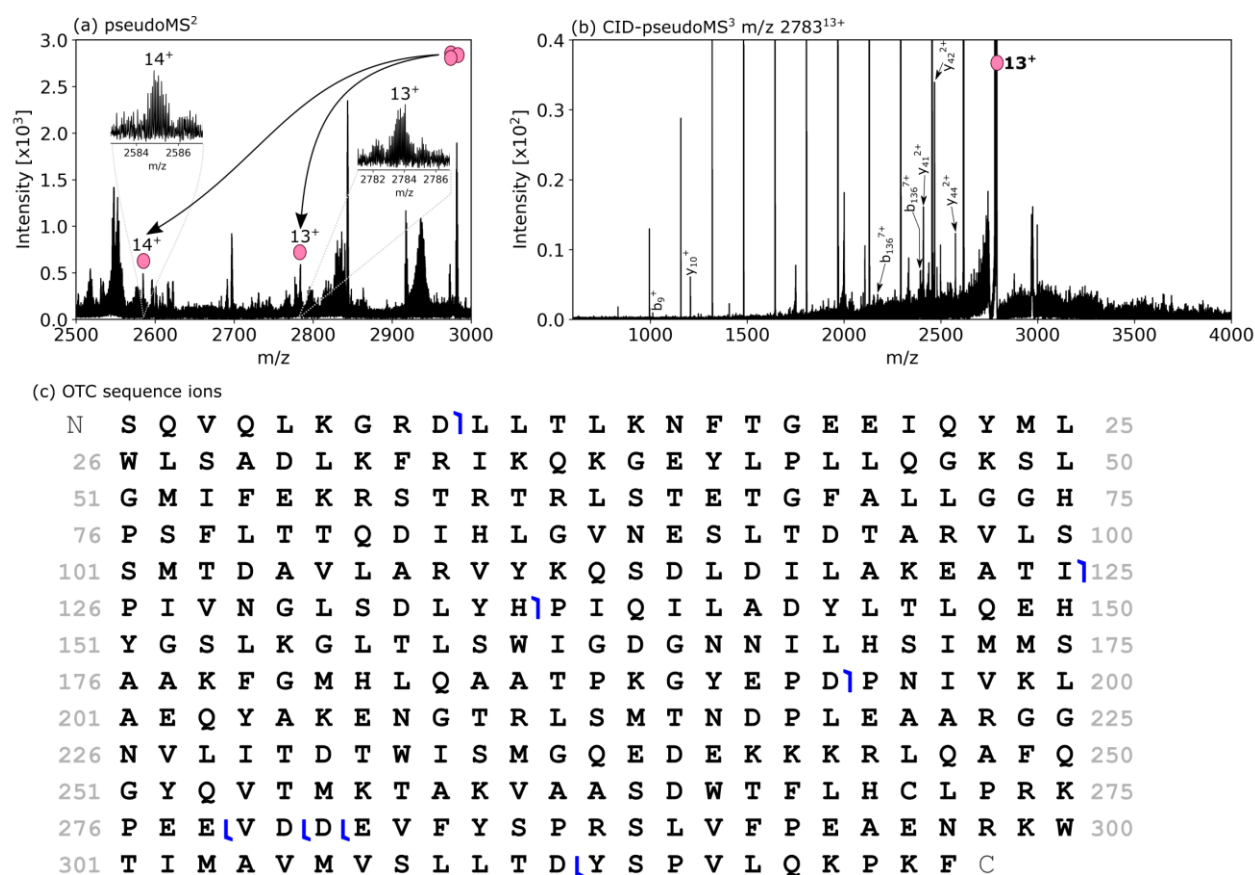

**Figure S19:** (a) nanoESI-pseudoMS<sup>2</sup> by in-source fragmentation enabled detection of isotopically resolved OTC monomers consistent with the intact assembly being a homotrimer (Data were acquired on the Orbitrap Eclipse at orbitrap resolution = 500,000 at m/z 200). (b) NanoESI-pseudoMS<sup>3</sup> by isolation and CID fragmentation of the 13<sup>+</sup> monomer provided main sequence product ions from OTC. P-score = 0.15. 8 of 10 sequence ions are explained by cleavage at D or P residues. The regular intense peaks are attributable to product ions from carbohydrate precursor ions co-isolated with OTC 13<sup>+</sup> which give a repeating neutral loss of -162Da. (c) Sequence ions assigned with a mass tolerance of 20 ppm.

**Table S10: sequence ions for OTC.**

| Name        | Theoretical Mass (Da) | Observed Mass (Da) | Mass Difference (Da) | Mass Difference (ppm) |
|-------------|-----------------------|--------------------|----------------------|-----------------------|
| <b>b9</b>   | 1011.5464             | 1011.5478          | -0.0014              | -5.5                  |
| <b>b125</b> | 13992.4582            | 13992.4066         | -0.0516              | -3.7                  |
| <b>b136</b> | 15201.0772            | 15200.8124         | -0.2648              | -17.4                 |
| <b>b194</b> | 21537.2621            | 21537.1460         | -0.1161              | -5.4                  |
| <b>y10</b>  | 1205.6808             | 1205.6773          | -0.0035              | -2.9                  |
| <b>y41</b>  | 4815.5172             | 4815.4878          | -0.0294              | -6.1                  |
| <b>y42</b>  | 4930.5441             | 4930.5140          | -0.0301              | -6.1                  |
| <b>y44</b>  | 5144.6394             | 5144.6696          | 0.0302               | 5.9                   |

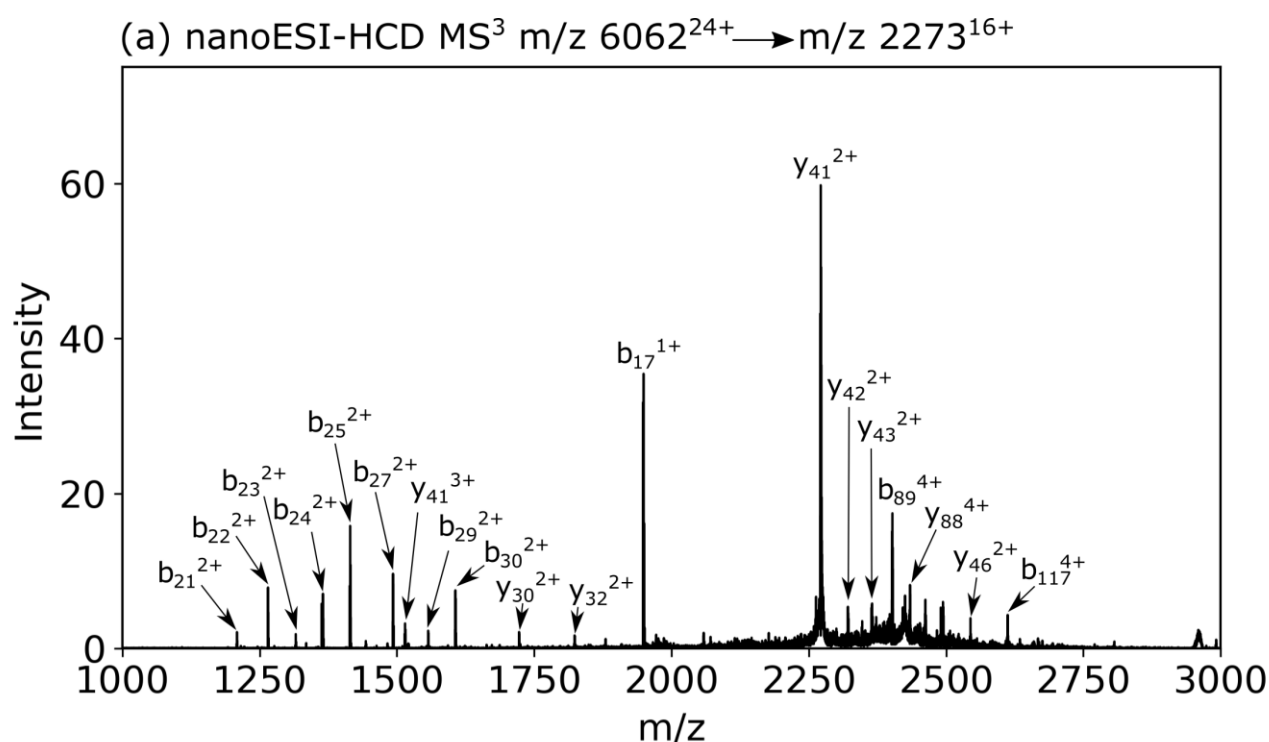

(b) LDHA sequence ions

```

N  A A L K D Q L I I V N L L K E E Q V P Q N K I I T V V 25
26 G V G A V G M A C A I S I L M K D L A D E L A L V 50
51 D V I E D K L K G E M M D L Q H G S L F L K T P K 75
76 I V S S K D Y S V T A N S K L V I I T A G A R Q Q 100
101 E G E S R L N L V Q R N V N I F K F I I P N V V K 125
126 Y S P Q C K L L I V S N P V D I L T Y V A W K I S 150
151 G F P K N R V I G S G C N L D S A R F R Y L M G E 175
176 R L G V H P L S C H G W V L G E H G D S S V P V W 200
201 S G V N V A G V S L K S L N P Q L G T D A D K E Q 225
226 W K D V H K Q V V D S A Y E V I K L K G Y T S W A 250
251 I G L S V A D L A E S I M K N L R R V H P I S T M 275
276 I K G L Y G I K E D V F L S V P C I L G Q N G I S 300
301 D V V K V T L T P D E E A R L K K S A D T L W G I 325
326 Q K E L Q F C

```

**Figure S20:** (a) nanoESI-HCD MS<sup>3</sup> of LDHA. Tetramers were dissociated to monomers by HCD (NCE = 40%) then the monomer was isolated and dissociated by HCD (NCE = 60%). (b) LDHA sequence ions assigned within a mass tolerance of 20 ppm. P-score = 3.5e-10. 6 of 24 sequence ions were the result of cleavage at the C-terminus of D or N-terminus of P.

**Table S11: Sequence ions for LDHA**

| Name        | Theoretical Mass (Da) | Observed Mass (Da) | Mass difference (Da) | Mass Difference (ppm) |
|-------------|-----------------------|--------------------|----------------------|-----------------------|
| <b>b7</b>   | 781.4334              | 781.4385           | -0.0051              | -2.8                  |
| <b>b8</b>   | 894.5174              | 894.5222           | -0.0048              | -2.8                  |
| <b>b17</b>  | 1947.1040             | 1947.112           | -0.0080              | -3.4                  |
| <b>b9</b>   | 993.5859              | 993.5897           | -0.0038              | -3.5                  |
| <b>b21</b>  | 2414.3532             | 2414.36            | -0.0064              | -3.4                  |
| <b>b22</b>  | 2527.4374             | 2527.443           | -0.0058              | -3.5                  |
| <b>b23</b>  | 2628.4850             | 2628.492           | -0.0070              | -2.9                  |
| <b>y11</b>  | 1361.7343             | 1361.737           | -0.0025              | -3.5                  |
| <b>b24</b>  | 2727.5534             | 2727.561           | -0.0074              | -2.6                  |
| <b>b25</b>  | 2826.6218             | 2826.626           | -0.0046              | -3.5                  |
| <b>b26</b>  | 2883.6432             | 2883.649           | -0.0056              | -3.1                  |
| <b>b27</b>  | 2982.7118             | 2982.716           | -0.0042              | -3.5                  |
| <b>y41</b>  | 4539.4048             | 4539.411           | -0.0059              | -3.5                  |
| <b>b29</b>  | 3110.7702             | 3110.772           | -0.0014              | -4.2                  |
| <b>b30</b>  | 3209.8388             | 3209.842           | -0.0028              | -3.7                  |
| <b>y30</b>  | 3441.8872             | 3441.883           | 0.0044               | -5.5                  |
| <b>y32</b>  | 3643.9460             | 3643.971           | -0.0246              | 2.7                   |
| <b>b17</b>  | 1947.1041             | 1947.105           | -0.0006              | -3.4                  |
| <b>y37</b>  | 4113.1746             | 4113.189           | -0.0146              | 0.0                   |
| <b>y41</b>  | 4539.4046             | 4539.403           | 0.0018               | -3.6                  |
| <b>y42</b>  | 4638.4730             | 4638.463           | 0.0096               | -5.2                  |
| <b>y43</b>  | 4725.5050             | 4725.524           | -0.0194              | 1.0                   |
| <b>b89</b>  | 9601.1289             | 9601.1             | 0.0285               | -6.0                  |
| <b>y88</b>  | 9727.2029             | 9727.279           | -0.0759              | 4.8                   |
| <b>y46</b>  | 5084.7260             | 5084.689           | 0.0370               | -10.1                 |
| <b>y117</b> | 13047.9071            | 13047.92           | -0.0161              | -1.6                  |

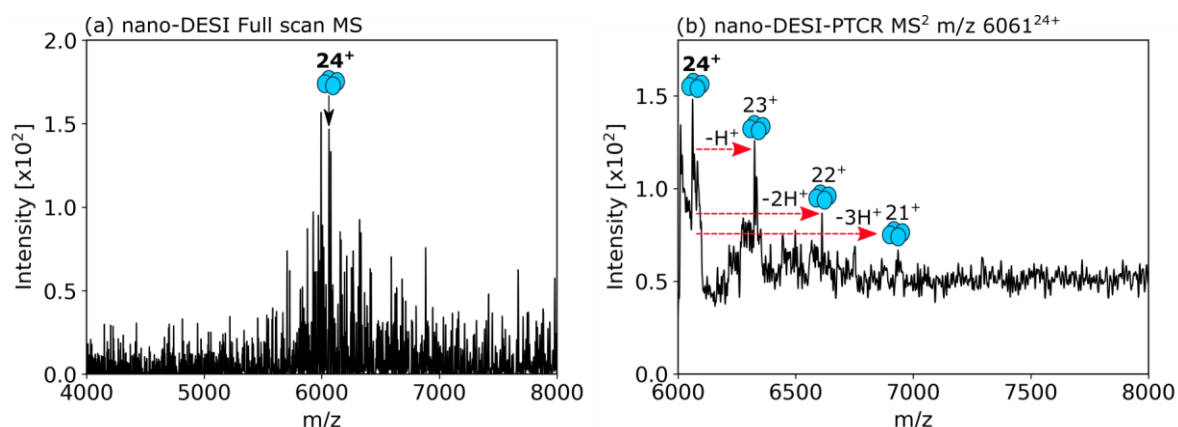

**Figure S21:** nano-DESI analysis of LDHA in kidney tissue (a) full scan mass spectrum with 24<sup>+</sup> charge state detected and (b) PTCR MS<sup>2</sup> spectrum of m/z 6061<sup>24+</sup> enabling confirmation of charge state and intact mass. The data is much noisier than the equivalent data obtained with nanoESI. Data were acquired on the Orbitrap Eclipse at an orbitrap resolution of 7500 at m/z 200.

## References

(1) Randall, E. C.; Bunch, J.; Cooper, H. J. Direct analysis of intact proteins from *Escherichia coli* colonies by liquid extraction surface analysis mass spectrometry *Anal Chem* **2014**, *86*, 10504-10510.
